# Supplementary material
Source: publisher figshare collection journal article supplement (https://gsajournals.figshare.com/ndownloader/files/13438469)
Supplement: Supplementary file 1 [file 13438469]

**Table S4** Genotyping results for the *EDA*:c.458delT-variant of reference dogs of other breeds.

| Dog breed | Number of dogs | Sex | Genotype |
| --- | --- | --- | --- |
| Akita Inu | 1 | m | wt/- |
|  | 2 | f | wt/wt |
| Shiba Inu | 1 | m | wt/- |
|  | 1 | f | wt/wt |
| Afghan Hound | 1 | m | wt/- |
|  | 6 | f | wt/wt |
| Italian Greyhound | 3 | f | wt/wt |
| Scottish Deerhound | 1 | m | wt/- |
| Borzoi | 1 | m | wt/- |
|  | 4 | f | wt/wt |
| Saluki | 1 | f | wt/wt |
| French Bulldog | 3 | m | wt/- |
|  | 2 | f | wt/wt |
| Great Dane | 3 | m | wt/- |
| Kuvasz | 2 | m | wt/- |
|  | 1 | f | wt/wt |
| Bernese Mountain Dog | 1 | f | wt/wt |
| Entlebucher Mountain Dog | 1 | m | wt/- |
| Golden Retriever | 1 | f | wt/wt |
| Labrador Retriever | 1 | f | wt/wt |
| Rhodesian Ridgeback | 2 | m | wt/- |
| Hovawart | 1 | m | wt/- |
|  | 1 | f | wt/wt |
| Australian Shepherd | 1 | m | wt/- |
|  | 1 | f | wt/wt |
| Border Collie | 1 | m | wt/- |
| Rough Collie | 1 | f | wt/wt |
| Weimaraner | 2 | m | wt/- |
| German Shepherd | 1 | m | wt/- |
|  | 1 | f | wt/wt |
| Belgian Shepherd | 1 | f | wt/wt |
| Tibetan Mastiff | 1 | f | wt/wt |
| Great Pyrenees | 2 | f | wt/wt |
| Hanover Hound | 2 | f | wt/wt |
| Briard | 2 | f | wt/wt |
| Beagle | 2 | f | wt/wt |
| Lagotto Romagnolo | 1 | m | wt/- |
|  | 4 | f | wt/wt |
| American Bulldog | 1 | f | wt/wt |
| American Staffordshire Terrier | 1 | f | wt/wt |
| German Wirehaired Pointer | 1 | f | wt/wt |
| English Cocker Spaniel | 1 | m | wt/- |
| English Springer Spaniel | 1 | m | wt/- |
| Tibetan Terrier | 1 | f | wt/wt |

The dog breed, the number of individuals per breed, and the respective sex and genotype are stated. 70 dogs of 34 breeds were tested in total.
